# Supplementary material
Source: publisher figshare collection journal article supplement (https://sage.figshare.com/ndownloader/files/22882271)
Supplement: Supplementary file 1 [file 22882271]

| Patient criteria   | Healthy Men with ATR                                                                                                                                                                                                                                                                                                                                                                                               |
|--------------------|--------------------------------------------------------------------------------------------------------------------------------------------------------------------------------------------------------------------------------------------------------------------------------------------------------------------------------------------------------------------------------------------------------------------|
| Inclusion criteria | <ul style="list-style-type: none"> <li>- Age between 18-60 years</li> <li>- Clinically and ultrasound diagnosed ATR</li> <li>- Achilles tendon rupture &lt; 4 days</li> <li>- Should be able to follow regime and postoperative controls during the 12 month</li> </ul>                                                                                                                                            |
| Exclusion criteria | <ul style="list-style-type: none"> <li>- Bilateral ATR</li> <li>- Acute distal Achilles rupture (insertion of calcaneus)</li> <li>- Former ATR or Achilles tendon surgery on the same side.</li> <li>- Severe medical illness: ASA score &gt; 2</li> <li>- Diabetes or cardiovascular disease</li> <li>- Steroid or PRP injections &lt; 6 month</li> <li>- Treatment with fluoroquinolones &lt; 6 month</li> </ul> |

**Appendix Table A1** Patient Inclusion and Exclusion Criteria in Men with Acute Achilles Tendon Rupture (ATR).

|                                    |                                                                                                                                                                                                                                                                                                                                                                                                                                                                                      |
|------------------------------------|--------------------------------------------------------------------------------------------------------------------------------------------------------------------------------------------------------------------------------------------------------------------------------------------------------------------------------------------------------------------------------------------------------------------------------------------------------------------------------------|
| <b>Basic exercises<sup>#</sup></b> | <ul style="list-style-type: none"> <li>- Exercise biking 10-15 min. (from week 10)</li> <li>- Active ankle range of motion without weight (pronation, supination, dorsal and plantar flexion) 2 x 10 reps.</li> <li>- Standing heel-rise 3 (2 x 3 sec tempo) x 10 reps</li> <li>- One standing leg balance exercise 3 x 30 sec.</li> </ul>                                                                                                                                           |
| <b>Week 9-11</b>                   | <ul style="list-style-type: none"> <li>- Basic exercises</li> <li>- Ankle range of motion (pronation, supination, dorsal and plantar flexion) with elastic band (knee extended) 2 x 20</li> <li>- Focus on gait training</li> <li>- Squat exercises with own body weight 2 x 15</li> <li>- Core training</li> <li>- Swimming aloud from week 10</li> </ul>                                                                                                                           |
| <b>Week 12-16</b>                  | <ul style="list-style-type: none"> <li>- Basic exercises</li> <li>- Walk on toes (support if needed) 2 x 5 m. Aloud climbing stairs if possible to walk 5 m on toes without help.</li> <li>- Standing heel-rises with increase weight 3 x 10 reps.</li> <li>- One standing leg balance exercise with closed eyes 3 x 30 sec.</li> <li>- Lunges (only with injured leg in front) 2 x 10 reps.</li> <li>- Core training</li> <li>- Swimming and cross-trainer (easy) aloud.</li> </ul> |
| <b>From week 16</b>                | <ul style="list-style-type: none"> <li>- Starting light jogging from week 16 if the above exercises could be performed.</li> <li>- Running on even ground allowed when patient were able to perform 5 proper single-legged heel-rises with approximately 90% of the height of the un-injured side.</li> <li>- Return to non-competitive sport gradual from 6 month</li> <li>- Return to heavy demanding sports from 9 month</li> </ul>                                               |

**Appendix Table A2** Training Rehabilitation Protocol in Patient with Acute Achilles Rupture.

<sup>#</sup> Home exercises should be performed 2 times/day
